# Supplementary material for: Cryoballoon Ablation for the Treatment of Atrial Fibrillation in Patients With Concomitant Heart Failure and Either Reduced or Preserved Left Ventricular Ejection Fraction: Results From the Cryo AF Global Registry
Source: PubMed Central journal article supplement — J Am Heart Assoc. 2021 Dec 10;10(24):e021323. doi: 10.1161/JAHA.121.021323 (PMC9075259; doi:10.1161/jaha.121.021323), 2021-12-10

# **SUPPLEMENTAL MATERIAL**

## Appendix S1. List of Study Group Investigators, Cryo AF Global Registry Investigators

|                                              |                                                                      |
|----------------------------------------------|----------------------------------------------------------------------|
| Jose Luis Gonzalez                           | Hospital Universitario Fundacion Favaloro, Argentina                 |
| Fernando Scuzzuso                            | Instituto Cardiovascular de Buenos Aires (ICBA), Argentina           |
| Clemens Steinwender                          | Kepler Universitätsklinikum Med Campus III., Austria                 |
| Jean-Manuel Herzet                           | Centre Hospitalier Regional de la Citadelle, Belgium                 |
| Peter Peytchev                               | Onze-Lieve-Vrouweziekenhuis-Campus Aalst, Belgium                    |
| Sofian Johar                                 | Gleneagles Jerudong Park Medical Centre, Brunei Darussalam           |
| Juan Manuel Camargo Ballestas                | Fundacion Clinica Shaio, Colombia                                    |
| Petr Neuzil                                  | Nemocnice Na Homolce, Czech Republic                                 |
| Julian Chun                                  | Cardioangiologisches Centrum Bethanien, Germany                      |
| Peter Falk                                   | Herz- und Gefasszentrum Bad Bevensen, Germany                        |
| Mike Foresti                                 | Kliniken Maria Hilf GmbH Monchengladbach -KH St. Franziskus, Germany |
| Sonia Busch                                  | Klinikum Coburg GmbH, Germany                                        |
| Sascha Stiller                               | Oberschwaben-Klinik GmbH Krankenhaus St. Elizabeth, Germany          |
| Christian Drephal                            | Sana Klinikum Lichtenberg, Germany                                   |
| Georgios Kourgiannidis                       | Hellenic Airforce 251 General Hospital, Greece                       |
| Zoltan Csanadi                               | Debreceni Egyetem, Hungary                                           |
| Csaba L. Földesi                             | Gottsegen György Országos Kardiovaszkuláris Intézet, Hungary         |
| Kristján Guðmundsson                         | Landspítali - National hospital of Iceland, Iceland                  |
| Roberto Rordorf, Enrico Baldi, Antonio Sanzo | Fondazione IRCCS Policlinico San Matteo, Italy                       |
| Massimo Tritto                               | Humanitas Mater Domini, Italy                                        |
| Gianluca Zingarini                           | Ospedale Santa Maria della Misericordia di Perugia, Italy            |
| Maria Grazia Bongiorno                       | Universitaria Pisana - Stabilimento di Cisanello, Italy              |
| Koichiro Kumagai                             | Fukuoka Sanno Hospital, Japan                                        |
| Masaomi Kimura                               | Hirosaki University Hospital, Japan                                  |
| Osamu Inaba                                  | Japanese Red Cross Saitama Hospital, Japan                           |
| Takashi Kurita                               | Kindai University Hospital, Japan                                    |
| Atsushi Kobori                               | Kobe City Medical Center General Hospital, Japan                     |
| Kenji Ando                                   | Kokura Kinen Hospital Japan                                          |
| Satoshi Shizuta                              | Kyoto University Hospital, Japan                                     |
| Masahiko Goya                                | Tokyo Medical and Dental University, Japan                           |
| Yasuteru Yamauchi                            | Yokohama City Minato Red Cross Hospital, Japan                       |
|                                              | Salman Al Abdallah Al Dabbous Cardiac Center, Kuwait                 |
| Razali Omar                                  | Cardiac Vascular Sentral Kuala Lumpur, Malaysia                      |
| Ahmad Fazli Abdul Aziz                       | Hospital Serdang, Malaysia                                           |
| Surinder Kaur Khelae                         | Institut Jantung Negara, Malaysia                                    |
| Gerardo Rodriguez Diez                       | Hospital San Angel Inn Universidad, Mexico                           |
| Pawel Ptaszynski                             | Centralny Szpital Kliniczny Uniwersytetu Medycznego w Lodzi          |
| Marcin Kuniewicz                             | Krakowski Szpital Specjalistyczny im. J. Pawła II, Poland            |
| Janusz Romanek                               | Spital Wojewodzki nr 2, Poland                                       |
| João José Primo                              | Centro Hospitalar de Vila Nova de Gaia/Espinho - Unidade I, Portugal |

|                              |                                                                      |
|------------------------------|----------------------------------------------------------------------|
| Faisal M.A. Al-Samadi        | King Fahad Medical City (KFMC), Saudi Arabia                         |
| Dejan Kojic                  | Institute for Cardio Vascular Disease Dedinje, Serbia                |
| Chi Keong Ching              | National Heart Centre Singapore, Singapore                           |
| Robert Hatala                | NUSCH a.s. Bratislava, Slovakia                                      |
| Martin Skamla                | Stredoslovensky ustav srdcovych a cievnych chorob a.s, Slovakia      |
| Silvia Misikova              | Vychodoslovensky ustav srdcovych a cievnych chorob, a.s, Slovakia    |
| Anthony P.J. Stanley         | Netcare Sunninghill Hospital, South Africa                           |
| Jesus-Manuel Paylos-Gonzalez | Hospital Universitario Moncloa, Spain                                |
| Jen-Yuan Kuo                 | Mackay Memorial Hospital-Tamsui Branch, Republic of Taiwan           |
| Cheng-Hung Li                | Taichung Veterans General Hospital, Republic of Taiwan               |
| Sirin Apiyasawat             | Ramathibodi Hospital, Thailand                                       |
| Arisara Suwanagool           | Siriraj Hospital, Thailand                                           |
| Derick Todd                  | Liverpool Heart and Chest Hospital, United Kingdom                   |
| Richard Schilling            | St Bartholomew's Hospital, United Kingdom                            |
| Mark Gallagher               | St George's University Hospitals - NHS Trust, United Kingdom         |
| Ewan Shepherd                | The Newcastle upon Tyne Hospitals - Freeman Hospital, United Kingdom |

**Table S1: List of participating centers**

| <b>Country</b>                  | <b>Center</b>                                               | <b>Number of Patients</b> |
|---------------------------------|-------------------------------------------------------------|---------------------------|
| <b>Total number of subjects</b> |                                                             | <b>1303</b>               |
| Argentina                       | Hospital Universitario Fundacion Favaloro                   | 67                        |
|                                 | Instituto Cardiovascular de Buenos Aires (ICBA)             | 93                        |
| Austria                         | Kepler Universitätsklinikum Med Campus III.                 | 20                        |
| Belgium                         | Centre Hospitalier Regional de la Citadelle                 | 83                        |
|                                 | Onze-Lieve-Vrouwziekenhuis-Campus Aalst                     | 2                         |
| Brunei Darussalam               | Gleneagles Jerudong Park Medical Centre                     | 1                         |
| Colombia                        | Fundacion Clinica Shaio                                     | 1                         |
| Czech Republic                  | Nemocnice Na Homolce                                        | 24                        |
| Germany                         | Cardioangiologisches Centrum Bethanien                      | 47                        |
|                                 | Herz- und Gefasszentrum Bad Bevensen                        | 19                        |
|                                 | Kliniken Maria Hilf GmbH Monchengladbach -KH St. Franziskus | 28                        |
|                                 | Klinikum Coburg GmbH                                        | 11                        |
|                                 | Oberschwaben-Klinik GmbH Krankenhaus St. Elizabeth          | 4                         |
|                                 | Sana Klinikum Lichtenberg                                   | 46                        |
| Greece                          | Hellenic Airforce 251 General Hospital                      | 11                        |
| Hungary                         | Debreceni Egyetem                                           | 9                         |
|                                 | Gottsegen György Országos Kardiovaszkuláris Intézet         | 63                        |
| Iceland                         | Landspítali - National hospital of Iceland                  | 1                         |
| Italy                           | Fondazione IRCCS Policlinico San Matteo                     | 9                         |
|                                 | Humanitas Mater Domini                                      | 10                        |
|                                 | Ospedale Santa Maria della Misericordia di Perugia          | 15                        |
|                                 | Universitaria Pisana - Stabilimento di Cisanello            | 24                        |
| Japan                           | Fukuoka Sanno Hospital                                      | 36                        |
|                                 | Hirosaki University Hospital                                | 29                        |
|                                 | Japanese Red Cross Saitama Hospital                         | 39                        |
|                                 | Kindai University Hospital                                  | 35                        |

| <b>Country</b>      | <b>Center</b>                                               | <b>Number of Patients</b> |
|---------------------|-------------------------------------------------------------|---------------------------|
|                     | Kobe City Medical Center General Hospital                   | 29                        |
|                     | Kokura Kinen Hospital                                       | 30                        |
|                     | Kyoto University Hospital                                   | 35                        |
|                     | Tokyo Medical and Dental University                         | 26                        |
|                     | Yokohama City Minato Red Cross Hospital                     | 38                        |
| Kuwait              | Salman Al Abdallah Al Dabbous Cardiac Center                | 25                        |
| Malaysia            | Cardiac Vascular Sentral Kuala Lumpur                       | 3                         |
|                     | Hospital Serdang                                            | 3                         |
|                     | Institut Jantung Negara                                     | 22                        |
| Mexico              | Hospital San Angel Inn Universidad                          | 18                        |
| Poland              | Centralny Szpital Kliniczny Uniwersytetu Medycznego w Lodzi | 52                        |
|                     | Krakowski Szpit.Specjalist.im.J.Pawla II                    | 18                        |
|                     | Spital Wojewodzki nr 2                                      | 4                         |
| Portugal            | Centro Hospitalar de Vila Nova de Gaia/Espinho - Unidade I  | 4                         |
| Saudi Arabia        | King Fahad Medical City (KFMC)                              | 29                        |
| Serbia              | Insitute for Cardio Vascular Disease Dedinje                | 18                        |
| Singapore           | National Heart Centre Singapore                             | 6                         |
| Slovakia            | NUSCH a.s. Bratislava                                       | 14                        |
|                     | Stredoslovensky ustav srdcovych a cievnych chorob a.s       | 26                        |
|                     | Vychodoslovensky ustav srdcovych a cievnych chorob, a.s     | 47                        |
| South Africa        | Netcare Sunninghill Hospital                                | 27                        |
| Spain               | Hospital Universitario Moncloa                              | 17                        |
| Taiwan, Republic of | Mackay Memorial Hospital-Tamsui Branch                      | 4                         |
|                     | Taichung Veterans General Hospital                          | 8                         |
| Thailand            | Ramathibodi Hospital                                        | 4                         |
|                     | Siriraj Hospital                                            | 3                         |
| United Kingdom      | Liverpool Heart and Chest Hospital                          | 56                        |
|                     | St Bartholomew's Hospital                                   | 3                         |

| <b>Country</b> | <b>Center</b>                                        | <b>Number of Patients</b> |
|----------------|------------------------------------------------------|---------------------------|
|                | St George's University Hospitals - NHS Trust         | 2                         |
|                | The Newcastle upon Tyne Hospitals - Freeman Hospital | 5                         |

In the Cryo AF Global Registry, patients were classified at enrollment as either a heart failure patient or no heart failure by their clinician. For those with heart failure, a NYHA assessment was performed during baseline testing. Table 1 summarizes the baseline characteristics by NYHA classification. A progression and greater incidence of comorbidities are observed from no heart failure to NYHA I supporting the investigator classification of heart failure for the NYHA I patients.

**Table S2. Patient Baseline Characteristics.**

| <b>Subject Characteristics</b>                           | <b>No Heart Failure<br/>(N = 985)</b> | <b>Heart Failure<br/>NYHA I<br/>(N = 179)</b> | <b>Heart Failure<br/>NYHA II/III<br/>(N = 139)</b> | <b>p-value<br/>(No HF vs<br/>NYHA I)</b> |
|----------------------------------------------------------|---------------------------------------|-----------------------------------------------|----------------------------------------------------|------------------------------------------|
| Female sex (N (%))                                       | 331 (33.6%)                           | 81 (45.3%)                                    | 64 (46.0%)                                         | < 0.01                                   |
| Age in years (mean ± STD)                                | 60 ± 12                               | 63 ± 11                                       | 64 ± 11                                            | < 0.01                                   |
| Body mass index in kg/m <sup>2</sup> (mean ± STD)        | 27 ± 5                                | 27 ± 5                                        | 29 ± 6                                             | 0.86                                     |
| CHA <sub>2</sub> DS <sub>2</sub> -VASc Score (mean ± SD) | 1.6 ± 1.4                             | 3.2 ± 1.5                                     | 3.6 ± 1.7                                          | < 0.01                                   |
| Paroxysmal AF (N (%))                                    | 844 (85.7%)                           | 150 (83.8%)                                   | 86 (61.9%)                                         | 0.49                                     |
| Years diagnosed with AF (mean ± STD)                     | 3.3 ± 5.1                             | 3.5 ± 4.9                                     | 2.9 ± 3.7                                          | 0.54                                     |
| History of Atrial Flutter                                | 50 (5.1%)                             | 7 (3.9%)                                      | 1 (0.7%)                                           | 0.71                                     |
| History of Atrial Tachycardia                            | 12 (1.2%)                             | 2 (1.1%)                                      | 1 (0.7%)                                           | 1.00                                     |
| Left atrial diameter in cm (mean ± STD)                  | 40 ± 7                                | 43 ± 10                                       | 45 ± 8                                             | < 0.01                                   |
| Left ventricular ejection fraction in % (mean ± STD)     | 62 ± 7                                | 62 ± 10                                       | 53 ± 14                                            | 0.89                                     |
| LVEF ≤ 40%                                               | 6 (0.6%)                              | 6 (3.4%)                                      | 28 (20.1%)                                         |                                          |
| LVEF 40-50%                                              | 15 (1.5%)                             | 5 (2.8%)                                      | 12 (8.6%)                                          |                                          |
| LVEF ≥ 50%                                               | 816 (82.8%)                           | 138 (77.1%)                                   | 88 (63.3%)                                         |                                          |
| Not reported (N,%)                                       | 148 (15.0%)                           | 30 (16.8%)                                    | 11 (7.9%)                                          |                                          |
| Number of failed AADs (mean ± STD)                       | 0.8 ± 0.7                             | 0.8 ± 0.8                                     | 0.8 ± 0.7                                          | 0.82                                     |
| First-line cryoablation (N (%))                          | 306 (31.1%)                           | 51 (28.5%)                                    | 38 (27.3%)                                         | 0.48                                     |
| Hypertension (N (%))                                     | 484 (49.1%)                           | 111 (62.0%)                                   | 105 (75.5%)                                        | < 0.01                                   |
| Prior cardiac device implant (N (%))                     | 33 (3.4%)                             | 9 (5.0%)                                      | 20 (14.4%)                                         | 0.28                                     |
| Prior myocardial infarction (N (%))                      | 17 (1.7%)                             | 4 (2.2%)                                      | 8 (5.8%)                                           | 0.55                                     |
| Prior stroke/transient ischemic attack (N (%))           | 56 (5.7%)                             | 14 (7.8%)                                     | 10 (7.2%)                                          | 0.30                                     |
| Coronary artery disease (N (%))                          | 60 (6.1%)                             | 22 (12.3%)                                    | 24 (17.3%)                                         | < 0.01                                   |
| Diabetes (N (%))                                         | 100 (10.2%)                           | 19 (10.6%)                                    | 35 (25.2%)                                         | 0.89                                     |
| Sleep apnea (N (%))                                      | 31 (3.1%)                             | 8 (4.5%)                                      | 6 (4.3%)                                           | 0.37                                     |

AF: atrial fibrillation; HF: heart failure; NYHA Class: New York Heart Association functional classification; CHA<sub>2</sub>DS<sub>2</sub>-VASc Score: congestive heart failure, hypertension, age (2 points), diabetes, previous stroke/transient ischemic attack (2 points), vascular disease; LVEF: left ventricular ejection fraction; AAD: anti-arrhythmic drug.

Figure S1 displays the Kaplan-Meier estimate of 12-month freedom from AF/AT/AFL recurrence in subgroups based on NYHA classification. In a Cox regression sub-analysis of the HF cohort and NYHA classification, 12-month freedom from atrial arrhythmia recurrence was not statistically different between patients with No-HF vs HF NYHA Class I vs HF NYHA Class II/III (P=0.08).

AF: atrial fibrillation; AFL: atrial flutter; AT: atrial tachycardia; PAF: paroxysmal atrial fibrillation; PsAF: persistent atrial fibrillation; HF: heart failure; No-HF: no heart failure; NYHA Class: New York Heart Association functional classification.

**Figure S1. Freedom from atrial arrhythmia recurrence over 12-months by NYHA subgroup**

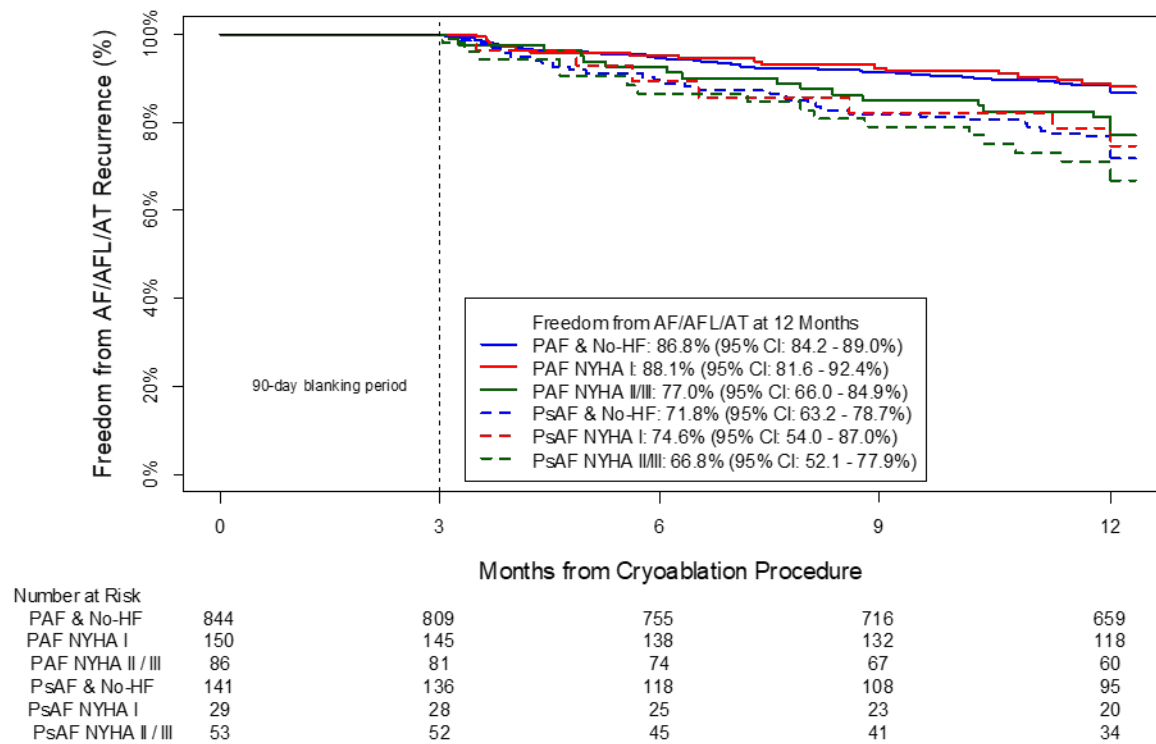



Figure S2 displays the Kaplan-Meier estimate of 12-month freedom from AF/AT/AFL recurrence in subgroups based on LVEF (no-HF, HF & preserved LVEF, HF & reduced LVEF). In a Cox regression sub-analysis of the cohorts, 12-month freedom from atrial arrhythmia recurrence was not statistically different between patients with No-HF vs HF-pEF vs HF-rEF (P=0.23).

AF: atrial fibrillation; AFL: atrial flutter; AT: atrial tachycardia; PAF: paroxysmal atrial fibrillation; PsAF: persistent atrial fibrillation; No-HF: no heart failure; LVEF: left ventricular ejection fraction

**Figure S2. Freedom from atrial arrhythmia recurrence over 12-months by LVEF subgroup**

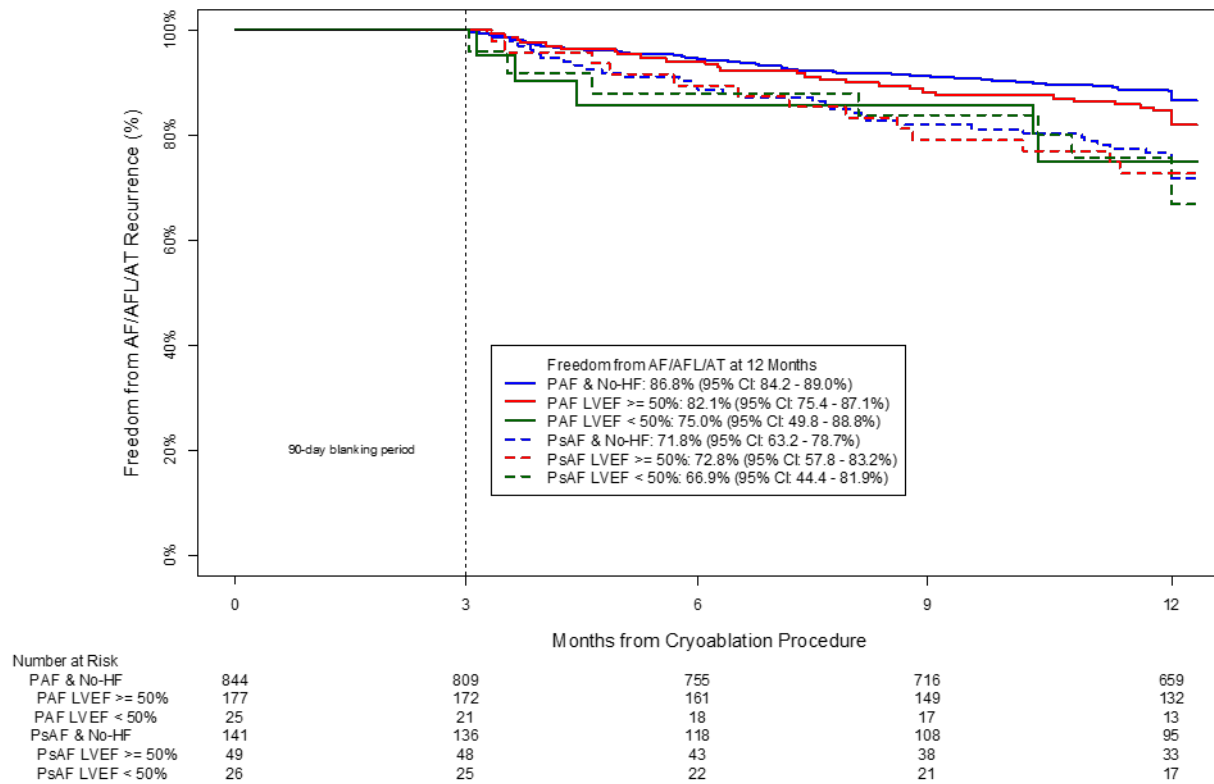

Supplement: JAH3-10-e021323-s001.pdf [file JAH3-10-e021323-s001.pdf]
